# Supplementary material for: Haemoglobin glycation index and risk for diabetes-related complications in the Action in Diabetes and Vascular Disease: Preterax and Diamicron Modified Release Controlled Evaluation (ADVANCE) trial
Source: Springer Nature journal article supplement (doi:10.1007/s00125-017-4539-1), 2018-01-08
Supplement: MOESM1 [file 15349462]

**ESM Table 1** Multivariable Cox proportional hazard regression analysis for major macrovascular events, major microvascular events, total mortality and severe hypoglycaemia predicted by treatment and HGI group, after additional adjustment for HbA<sub>1c</sub>

| Events by HGI group                           | Intensive treatment  |                     |                | Standard treatment   |                     |     | Adjusted HR <sup>e</sup> |                | <i>p</i> value for interaction <sup>f</sup> |
|-----------------------------------------------|----------------------|---------------------|----------------|----------------------|---------------------|-----|--------------------------|----------------|---------------------------------------------|
|                                               | At risk ( <i>n</i> ) | Events ( <i>n</i> ) | % <sup>d</sup> | At risk ( <i>n</i> ) | Events ( <i>n</i> ) | %   | Estimate (95% CI)        | <i>p</i> value |                                             |
| <b>Major macrovascular events<sup>a</sup></b> |                      |                     |                |                      |                     |     |                          |                |                                             |
| Overall                                       | 5542                 | 555                 | 5.0            | 5541                 | 587                 | 5.3 | 0.95 (0.84, 1.07)        | 0.407          | 0.114                                       |
| Low HGI                                       | 1873                 | 180                 | 4.9            | 1821                 | 164                 | 4.4 | 1.12 (0.91, 1.39)        | 0.285          |                                             |
| Intermediate HGI                              | 1829                 | 167                 | 4.5            | 1867                 | 178                 | 4.8 | 0.92 (0.74, 1.14)        | 0.441          |                                             |
| High HGI                                      | 1840                 | 208                 | 5.6            | 1853                 | 245                 | 6.6 | 0.83 (0.69, 1.00)        | 0.055          |                                             |
| <b>Major microvascular events<sup>b</sup></b> |                      |                     |                |                      |                     |     |                          |                |                                             |
| Overall                                       | 5542                 | 526                 | 4.7            | 5541                 | 603                 | 5.4 | 0.87 (0.77, 0.99)        | 0.030          | 0.825                                       |
| Low HGI                                       | 1873                 | 141                 | 3.8            | 1821                 | 159                 | 4.3 | 0.84 (0.67, 1.05)        | 0.128          |                                             |
| Intermediate HGI                              | 1829                 | 148                 | 4.0            | 1867                 | 178                 | 4.8 | 0.87 (0.70, 1.09)        | 0.222          |                                             |
| High HGI                                      | 1840                 | 237                 | 6.4            | 1853                 | 266                 | 7.2 | 0.92 (0.77, 1.09)        | 0.328          |                                             |
| <b>Total mortality</b>                        |                      |                     |                |                      |                     |     |                          |                |                                             |
| Overall                                       | 5542                 | 494                 | 4.5            | 5541                 | 531                 | 4.8 | 0.95 (0.84, 1.08)        | 0.426          | 0.011                                       |
| Low HGI                                       | 1873                 | 160                 | 4.3            | 1821                 | 137                 | 3.7 | 1.17 (0.93, 1.48)        | 0.177          |                                             |
| Intermediate HGI                              | 1829                 | 160                 | 4.3            | 1867                 | 162                 | 4.4 | 0.98 (0.79, 1.23)        | 0.892          |                                             |
| High HGI                                      | 1840                 | 174                 | 4.7            | 1853                 | 232                 | 6.3 | 0.74 (0.61, 0.91)        | 0.003          |                                             |
| <b>Severe hypoglycaemia<sup>c</sup></b>       |                      |                     |                |                      |                     |     |                          |                |                                             |
| Overall                                       | 5542                 | 149                 | 1.3            | 5541                 | 81                  | 0.7 | 1.82 (1.38, 2.40)        | <.0001         | 0.228                                       |
| Low HGI                                       | 1873                 | 34                  | 0.9            | 1821                 | 24                  | 0.6 | 1.34 (0.79, 2.27)        | 0.275          |                                             |
| Intermediate HGI                              | 1829                 | 49                  | 1.3            | 1867                 | 28                  | 0.8 | 1.82 (1.17, 2.90)        | 0.012          |                                             |
| High HGI                                      | 1840                 | 66                  | 1.8            | 1853                 | 29                  | 0.8 | 2.45 (1.57, 3.85)        | <.0001         |                                             |

<sup>a</sup>Major macrovascular events were defined as death from a cardiovascular cause, non-fatal myocardial infarction or stroke

<sup>b</sup>Major microvascular events were defined as new or worsening nephro- or retinopathy

<sup>c</sup>Severe hypoglycaemic episodes were defined as transient dysfunction of the central nervous system with the inability to treat oneself

<sup>d</sup>Percentage individuals with an event respective to the total cohort of 11,083 individuals

<sup>e</sup>Model was adjusted for age, sex, ethnic origin (Asian vs non-Asian), BMI, duration of type 2 diabetes, history of macro- and microvascular events, current drinking and smoking, use of glucose-lowering drugs, use of BP-lowering drugs, systolic BP, diastolic BP, haemoglobin, renal function (eGFR), LDL-, HDL- and total cholesterol, triacylglycerol, HbA<sub>1c</sub>

<sup>f</sup>*p* value for interaction between treatment effect and HGI group

**ESM Table 2** Multivariable Cox proportional hazard regression analysis for major macrovascular events, major microvascular events, total mortality and severe hypoglycaemia predicted by treatment and HbA<sub>1c</sub> group

| Events by HGI group                           | Intensive treatment  |                     |                | Standard treatment   |                     |     | Adjusted HR <sup>e</sup> |                | <i>p</i> value for interaction <sup>f</sup> |
|-----------------------------------------------|----------------------|---------------------|----------------|----------------------|---------------------|-----|--------------------------|----------------|---------------------------------------------|
|                                               | At risk ( <i>n</i> ) | Events ( <i>n</i> ) | % <sup>d</sup> | At risk ( <i>n</i> ) | Events ( <i>n</i> ) | %   | Estimate (95% CI)        | <i>p</i> value |                                             |
| <b>Major macrovascular events<sup>a</sup></b> |                      |                     |                |                      |                     |     |                          |                |                                             |
| Overall                                       | 5542                 | 555                 | 5.0            | 5541                 | 587                 | 5.3 | 0.94 (0.84, 1.06)        | 0.326          | 0.915                                       |
| Low HGI                                       | 1926                 | 168                 | 4.4            | 1891                 | 175                 | 4.6 | 0.97 (0.79, 1.20)        | 0.808          |                                             |
| Intermediate HGI                              | 1810                 | 167                 | 4.6            | 1834                 | 171                 | 4.7 | 0.94 (0.75, 1.16)        | 0.558          |                                             |
| High HGI                                      | 1806                 | 220                 | 6.1            | 1816                 | 241                 | 6.7 | 0.92 (0.76, 1.10)        | 0.357          |                                             |
| <b>Major microvascular events<sup>b</sup></b> |                      |                     |                |                      |                     |     |                          |                |                                             |
| Overall                                       | 5542                 | 526                 | 4.7            | 5541                 | 603                 | 5.4 | 0.88 (0.78, 1.00)        | 0.048          | 0.566                                       |
| Low HGI                                       | 1926                 | 132                 | 3.5            | 1891                 | 157                 | 4.1 | 0.81 (0.64, 1.02)        | 0.075          |                                             |
| Intermediate HGI                              | 1810                 | 140                 | 3.8            | 1834                 | 144                 | 4.0 | 0.97 (0.77, 1.23)        | 0.788          |                                             |
| High HGI                                      | 1806                 | 254                 | 7.0            | 1816                 | 302                 | 8.3 | 0.88 (0.74, 1.04)        | 0.129          |                                             |
| <b>Total mortality</b>                        |                      |                     |                |                      |                     |     |                          |                |                                             |
| Overall                                       | 5542                 | 494                 | 4.5            | 5541                 | 531                 | 4.8 | 0.93 (0.82, 1.06)        | 0.277          | 0.530                                       |
| Low HGI                                       | 1926                 | 147                 | 3.9            | 1891                 | 143                 | 3.7 | 1.04 (0.82, 1.31)        | 0.761          |                                             |
| Intermediate HGI                              | 1810                 | 158                 | 4.3            | 1834                 | 173                 | 4.7 | 0.88 (0.71, 1.10)        | 0.261          |                                             |
| High HGI                                      | 1806                 | 189                 | 5.2            | 1816                 | 215                 | 5.9 | 0.89 (0.73, 1.08)        | 0.240          |                                             |
| <b>Severe hypoglycaemia<sup>c</sup></b>       |                      |                     |                |                      |                     |     |                          |                |                                             |
| Overall                                       | 5542                 | 149                 | 1.3            | 5541                 | 81                  | 0.7 | 1.85 (1.40, 2.45)        | <.0001         | 0.018                                       |
| Low HGI                                       | 1926                 | 34                  | 0.9            | 1891                 | 32                  | 0.8 | 1.08 (0.66, 1.76)        | 0.758          |                                             |
| Intermediate HGI                              | 1810                 | 55                  | 1.5            | 1834                 | 27                  | 0.7 | 2.02 (1.27, 3.20)        | 0.003          |                                             |
| High HGI                                      | 1806                 | 60                  | 1.7            | 1816                 | 22                  | 0.6 | 2.92 (1.77, 4.80)        | <.0001         |                                             |

<sup>a</sup>Major macrovascular events were defined as death from a cardiovascular cause, non-fatal myocardial infarction or stroke

<sup>b</sup>Major microvascular events were defined as new or worsening nephro- or retinopathy

<sup>c</sup>Severe hypoglycaemic episodes were defined as transient dysfunction of the central nervous system with the inability to treat oneself

<sup>d</sup>Percentage individuals with an event respective to the total cohort of 11,083 individuals

<sup>e</sup>Model was adjusted for age, sex, ethnic origin (Asian vs non-Asian), BMI, duration of type 2 diabetes, history of macro- and microvascular events, current drinking and smoking, use of glucose-lowering drugs, use of BP-lowering drugs, systolic BP, diastolic BP, haemoglobin, renal function (eGFR), LDL-, HDL- and total cholesterol, triacylglycerol

<sup>f</sup>*p* value for interaction between treatment effect and HGI group

**ESM Table 3** Cox proportional hazard regression analysis for major macrovascular events, major microvascular events, total mortality and severe hypoglycaemia predicted by HGI group (using the low group as a reference), after additional adjustment for HbA<sub>1c</sub>

| Events by HGI group                           | At risk (n) | Events (n) | %    | Unadjusted HR     |                  | Adjusted HR <sup>d</sup> |                  |
|-----------------------------------------------|-------------|------------|------|-------------------|------------------|--------------------------|------------------|
|                                               |             |            |      | Estimate 95% CI   | p value (vs low) | Estimate 95% CI          | p value (vs low) |
| <b>Major macrovascular events<sup>a</sup></b> |             |            |      |                   |                  |                          |                  |
| Overall                                       | 11083       | 1142       | 10.3 |                   |                  |                          |                  |
| Low HGI                                       | 3694        | 344        | 9.3  |                   |                  |                          |                  |
| Intermediate HGI                              | 3696        | 345        | 9.3  | 1.00 (0.86, 1.16) | 0.989            | 0.89 (0.77, 1.04)        | 0.160            |
| High HGI                                      | 3693        | 453        | 12.3 | 1.35 (1.17, 1.55) | <0.0001          | 0.98 (0.81, 1.17)        | 0.797            |
| <b>Major microvascular events<sup>b</sup></b> |             |            |      |                   |                  |                          |                  |
| Overall                                       | 11083       | 1129       | 10.2 |                   |                  |                          |                  |
| Low HGI                                       | 3694        | 300        | 8.1  |                   |                  |                          |                  |
| Intermediate HGI                              | 3696        | 326        | 8.8  | 1.09 (0.93, 1.27) | 0.286            | 0.95 (0.81, 1.12)        | 0.531            |
| High HGI                                      | 3693        | 503        | 13.6 | 1.77 (1.53, 2.04) | <0.0001          | 0.93 (0.78, 1.12)        | 0.458            |
| <b>Total mortality</b>                        |             |            |      |                   |                  |                          |                  |
| Overall                                       | 11083       | 1025       | 9.2  |                   |                  |                          |                  |
| Low HGI                                       | 3694        | 297        | 8.0  |                   |                  |                          |                  |
| Intermediate HGI                              | 3696        | 322        | 8.7  | 1.09 (0.93, 1.27) | 0.300            | 0.94 (0.79, 1.10)        | 0.435            |
| High HGI                                      | 3693        | 406        | 11.0 | 1.39 (1.19, 1.61) | <0.0001          | 1.07 (0.88, 1.30)        | 0.489            |
| <b>Severe hypoglycaemia<sup>c</sup></b>       |             |            |      |                   |                  |                          |                  |
| Overall                                       | 11083       | 230        | 2.1  |                   |                  |                          |                  |
| Low HGI                                       | 3694        | 58         | 1.6  |                   |                  |                          |                  |
| Intermediate HGI                              | 3696        | 77         | 2.1  | 1.30 (0.91, 1.84) | 0.144            | 1.23 (0.86, 1.77)        | 0.256            |
| High HGI                                      | 3693        | 95         | 2.6  | 1.56 (1.11, 2.20) | 0.010            | 1.29 (0.84, 1.97)        | 0.247            |

<sup>a</sup>Major macrovascular events are defined as death from a cardiovascular cause, non-fatal myocardial infarction or stroke

<sup>b</sup>Major microvascular events are defined as new or worsening nephro- or retinopathy

<sup>c</sup>Severe hypoglycaemic episodes were defined as transient dysfunction of the central nervous system with the inability to treat oneself

<sup>d</sup>Model was adjusted for age, sex, ethnic origin (Asian vs non-Asian), BMI, duration of type 2 diabetes, history of macro- and microvascular events, current drinking and smoking, use of glucose-lowering drugs, use of BP-lowering drugs, systolic BP, diastolic BP, haemoglobin, renal function (eGFR), LDL-, HDL- and total cholesterol, triacylglycerol, HbA<sub>1c</sub>

**ESM Table 4** Cox proportional hazard regression analysis for major macrovascular events, major microvascular events, total mortality and severe hypoglycaemia predicted by HbA<sub>1c</sub> group (using the low group as a reference)

| Events by HGI group                           | At risk (n) | Events (n) | %    | Unadjusted HR     |                  | Adjusted HR <sup>d</sup> |                  |
|-----------------------------------------------|-------------|------------|------|-------------------|------------------|--------------------------|------------------|
|                                               |             |            |      | Estimate 95% CI   | p value (vs low) | Estimate 95% CI          | p value (vs low) |
| <b>Major macrovascular events<sup>a</sup></b> |             |            |      |                   |                  |                          |                  |
| Overall                                       | 11083       | 1142       | 10.3 |                   |                  |                          |                  |
| Low HGI                                       | 3817        | 343        | 9.0  |                   |                  |                          |                  |
| Intermediate HGI                              | 3644        | 338        | 9.3  | 1.03 (0.89, 1.20) | 0.696            | 0.96 (0.83, 1.12)        | 0.620            |
| High HGI                                      | 3622        | 461        | 12.7 | 1.45 (1.26, 1.67) | <.0001           | 1.38 (1.20, 1.60)        | <.0001           |
| <b>Major microvascular events<sup>b</sup></b> |             |            |      |                   |                  |                          |                  |
| Overall                                       | 11083       | 1129       | 10.2 |                   |                  |                          |                  |
| Low HGI                                       | 3817        | 289        | 7.6  |                   |                  |                          |                  |
| Intermediate HGI                              | 3644        | 284        | 7.8  | 1.03 (0.88, 1.22) | 0.710            | 0.96 (0.82, 1.14)        | 0.671            |
| High HGI                                      | 3622        | 556        | 15.4 | 2.17 (1.88, 2.50) | <.0001           | 1.79 (1.54, 2.08)        | <.0001           |
| <b>Total mortality</b>                        |             |            |      |                   |                  |                          |                  |
| Overall                                       | 11083       | 1025       | 9.2  |                   |                  |                          |                  |
| Low HGI                                       | 3817        | 290        | 7.6  |                   |                  |                          |                  |
| Intermediate HGI                              | 3644        | 331        | 9.1  | 1.20 (1.02, 1.40) | 0.024            | 1.12 (0.96, 1.32)        | 0.151            |
| High HGI                                      | 3622        | 404        | 11.2 | 1.50 (1.29, 1.74) | <.0001           | 1.50 (1.28, 1.75)        | <.0001           |
| <b>Severe hypoglycaemia<sup>c</sup></b>       |             |            |      |                   |                  |                          |                  |
| Overall                                       | 11083       | 230        | 2.1  |                   |                  |                          |                  |
| Low HGI                                       | 3817        | 66         | 1.7  |                   |                  |                          |                  |
| Intermediate HGI                              | 3644        | 82         | 2.3  | 1.23 (0.88, 1.71) | 0.229            | 1.14 (0.81, 1.60)        | 0.450            |
| High HGI                                      | 3622        | 82         | 2.3  | 1.18 (0.84, 1.67) | 0.333            | 1.07 (0.75, 1.53)        | 0.724            |

<sup>a</sup>Major macrovascular events are defined as death from a cardiovascular cause, non-fatal myocardial infarction or stroke

<sup>b</sup>Major microvascular events are defined as new or worsening nephro- or retinopathy

<sup>c</sup>Severe hypoglycaemic episodes were defined as transient dysfunction of the central nervous system with the inability to treat oneself

<sup>d</sup>Model was adjusted for age, sex, ethnic origin (Asian vs non-Asian), BMI, duration of type 2 diabetes, history of macro- and microvascular events, current drinking and smoking, use of glucose-lowering drugs, use of BP-lowering drugs, systolic BP, diastolic BP, haemoglobin, renal function (eGFR), LDL-, HDL- and total cholesterol, triacylglycerol
